# Supplementary material
Source: PubMed Central journal article supplement (PMC10583602)
Supplement: NIHMS1935501-supplement-Supplementary_Information.pdf [file NIHMS1935501-supplement-Supplementary_Information.pdf]

**Supplementary information**

---

**Selective TnsC recruitment enhances the fidelity of RNA-guided transposition**

---

In the format provided by the authors and unedited

## Supplementary Figures Guide

### Selective TnsC recruitment enhances the fidelity of RNA-guided transposition

Florian T. Hoffmann<sup>1\*</sup>, Minjoo Kim<sup>1,4\*</sup>, Leslie Y. Beh<sup>1,5\*</sup>, Jing Wang<sup>1,6</sup>, Phuc Leo H. Vo<sup>2,7</sup>, Diego R. Gelsinger<sup>1</sup>, Jerrin Thomas George<sup>1</sup>, Christopher Acree<sup>1</sup>, Jason T. Mohabir<sup>3,8</sup>, Israel S. Fernández<sup>1,9</sup>, and Samuel H. Sternberg<sup>1</sup>

<sup>1</sup>Department of Biochemistry and Molecular Biophysics, Columbia University, New York, NY, USA. <sup>2</sup>Department of Molecular Pharmacology and Therapeutics, Columbia University, New York, NY, USA. <sup>3</sup>Department of Computer Science, Columbia University, New York, NY, USA.

\*These authors contributed equally to this work.

<sup>4</sup>Present address: Department of Biomedical Engineering, New York University Tandon School of Engineering, NY, USA.

<sup>5</sup>Present address: Illumina Singapore Pte, Ltd., Singapore 757716

<sup>6</sup>Present address: The National Resource for Automated Molecular Microscopy, Simons Electron Microscopy Center, New York Structural Biology Center, New York, NY, USA.

<sup>7</sup>Present address: Vertex Pharmaceuticals, Inc., Boston, MA, USA.

<sup>8</sup>Present address: Genomic Center for Infectious Diseases, Broad Institute, Cambridge, MA, USA.

<sup>9</sup>Present address: Department of Structural Biology, St Jude Children's Research Hospital, Memphis, TN, USA.

Correspondence and requests for materials should be addressed to I.S.F. ([israel.s.fernandez@gmail.com](mailto:israel.s.fernandez@gmail.com)) and S.H.S. ([shsternberg@gmail.com](mailto:shsternberg@gmail.com)).

**Supplementary Figure 1 | Uncropped SDS-PAGE images.**

Red dashed boxes indicate the cropped area used in the figures.

**Fig. 4a**

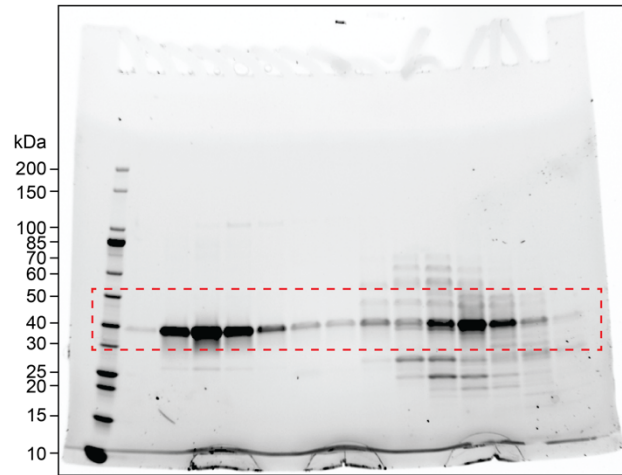

**Fig. 5a**

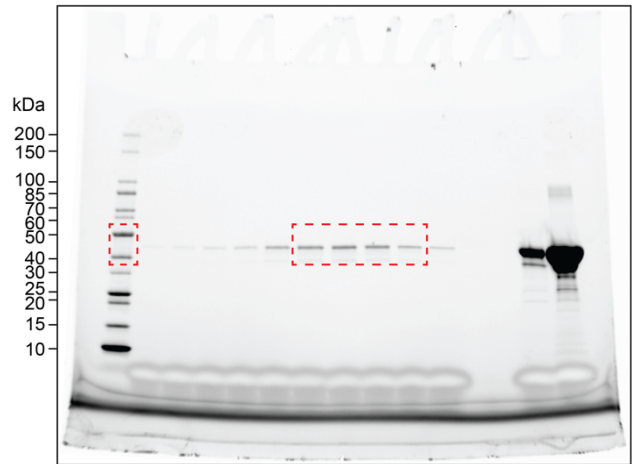

**Extended Data Fig. 6a**

WT TnsC

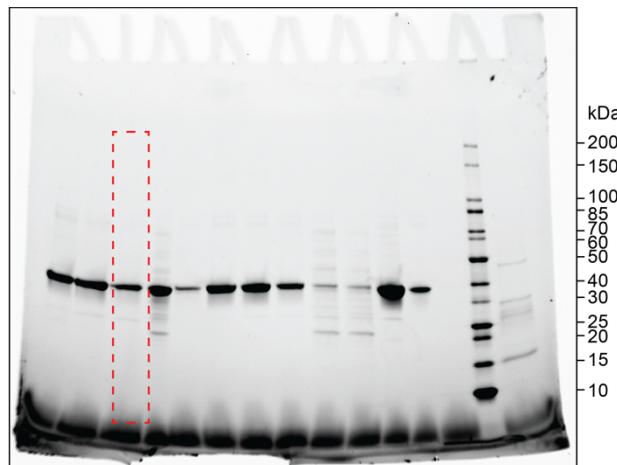

TnsC(K55A)

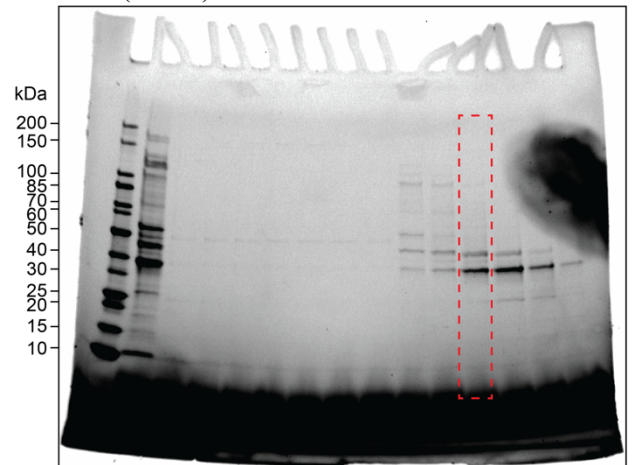

TnsC(E135A)

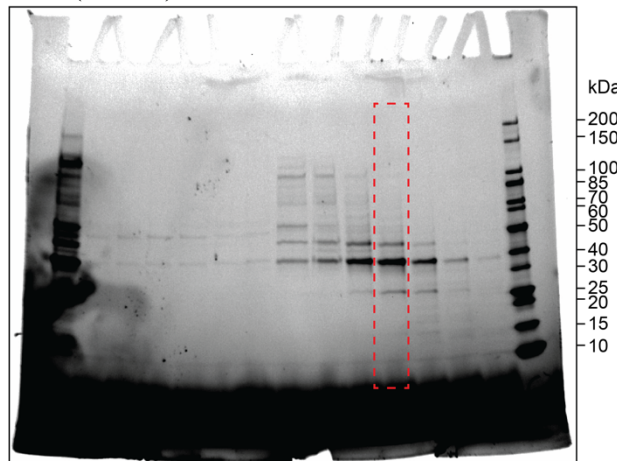

TnsC(R187A)

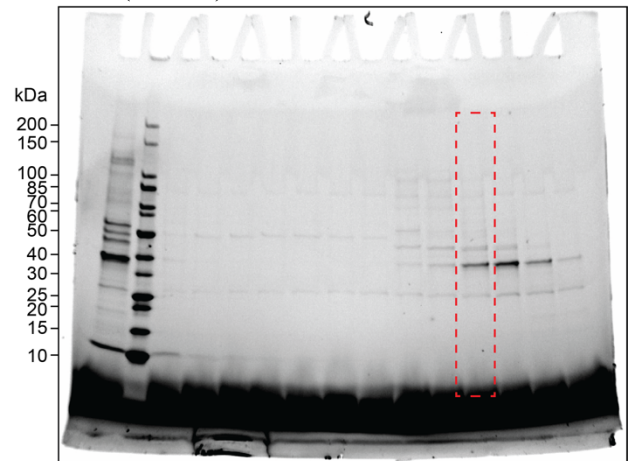

**Extended Data Fig. 6a, c, and 7c**TnsC( $\Delta$ A106-A113), TnsC(L275-K280 $\rightarrow$ AAAAAA), TnsC(F188-Q191 $\rightarrow$ AAAA)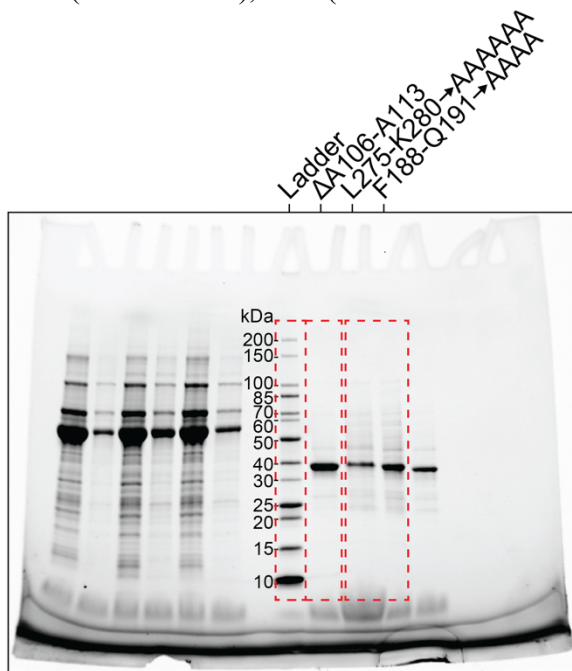

The SDS-PAGE image of the ladder was used in Extended Data Fig. 6a, c, and 7c.

The SDS-PAGE image of TnsC(L275-K280 $\rightarrow$ AAAAAA) and TnsC(F188-Q191 $\rightarrow$ AAAA) was used in Extended Data Fig. 6c.

The SDS-PAGE image of TnsC( $\Delta$ A106-A113) was used in Extended Data Fig. 7c.
